# Supplementary material for: COVID-19 Outcomes Among Users of CD20 Inhibitors for Immune-Mediated Diseases: A Comparative Cohort Study
Source: bioRxiv or medRxiv preprint supplement (doi:10.1101/2021.08.05.21261643), 2021-08-09
Supplement: Supplementary file [file media-1.pdf]

**Title:** COVID-19 Outcomes Among Users of CD20 Inhibitors for Immune-Mediated Diseases:  
A Comparative Cohort Study

**Authors:** Naomi J. Patel, MD<sup>\*†</sup>; Kristin M. D’Silva, MD, MPH<sup>\*†§</sup>; Tiffany Y-T. Hsu, MD, PhD<sup>||</sup>; Michael DiIorio, MD<sup>||</sup>; Xiaoqing Fu, MS<sup>‡§</sup>; Claire Cook, MPH<sup>‡§</sup>; Lauren Prisco, BA<sup>||</sup>; Lily Martin, BS<sup>||</sup>; Kathleen M.M. Vanni, BA<sup>||</sup>; Alessandra Zaccardelli, MS<sup>||</sup>; Yuqing Zhang, ScD<sup>‡§</sup>; Jeffrey A. Sparks, MD, MMSc<sup>†||</sup>; Zachary S. Wallace, MD, MSc<sup>†‡§</sup>

\*These authors contributed equally to this work (co-first authors).

†These authors contributed equally to this work (co-last authors).

**Affiliations:**

<sup>‡</sup>Division of Rheumatology, Allergy, and Immunology, Massachusetts General Hospital, Boston, MA, USA

<sup>§</sup>Clinical Epidemiology Program, Mongan Institute, Department of Medicine, Massachusetts General Hospital, Boston, MA, USA

<sup>||</sup>Division of Rheumatology, Inflammation, and Immunity, Brigham and Women’s Hospital, Boston, MA, USA

All at Harvard Medical School, Boston, MA.

**Supplement**

**Supplemental Table 1. Details of death following COVID-19 in immune-mediated cases treated with CD20 inhibitors and matched comparators.**

|                                           | <b>CD20 Inhibitor-Treated Immune-Mediated Case Deaths (n=12)</b> | <b>Matched Comparator Deaths (n=21)</b> |
|-------------------------------------------|------------------------------------------------------------------|-----------------------------------------|
| Age, years, mean ± SD                     | 69.0 ± 19.4                                                      | 77.0 ± 11.7                             |
| Female, n (%)                             | 5 (42)                                                           | 6 (29)                                  |
| Hospitalized within MGB, n (%)            | 11 (92)                                                          | 20 (95)                                 |
| Mechanically ventilated within MGB, n (%) | 4 (33)                                                           | 8 (38)                                  |
| “Do not intubate” code status, n (%)      | 6 (50)                                                           | 10 (48)                                 |

MGB, Mass General Brigham healthcare system; SD, standard deviation; COVID-19, Coronavirus Disease 2019.

**Supplemental Table 2. Risk of death following COVID-19 in patients treated with CD20 inhibitors for rheumatic disease indications versus comparators.**

|                                    | <b>CD20 Inhibitor-Treated Rheumatic Disease Cases (n=56)*</b> | <b>Matched Comparators (n=276)</b> |
|------------------------------------|---------------------------------------------------------------|------------------------------------|
| Deaths, n (%)                      | 7 (13)                                                        | 15 (5)                             |
| Total follow-up time (person-days) | 7917                                                          | 42560                              |
| Incidence rate/1000 days (95% CI)  | 0.9 (0.2 to 1.5)                                              | 0.4 (0.2 to 0.5)                   |
| Unadjusted HR (95% CI)             | 2.52 (1.07 to 5.90)                                           | Ref                                |
| Adjusted model 1 HR (95% CI)†      | 2.42 (1.02 to 5.74)                                           | Ref                                |
| Adjusted model 2 HR (95% CI)       | 2.02 (0.71 to 5.80)                                           | Ref                                |
| Adjusted model 3 HR (95% CI)‡      | NR                                                            | Ref                                |

HR, hazard ratio; CI, confidence interval; BMI, body mass index; CCI, Charlson comorbidity index; Ref, reference; NR, not reported

\* Rheumatic disease indication includes 54 patients with rheumatic disease indication only and 2 patients with combined rheumatic and hematologic indications.

† Model 1 adjusted for age. Model 2 adjusted for age and race. Model 3 adjusted for age, race, BMI, and CCI (dichotomized as <2 or ≥2).

‡ Model 3 not reported due to insufficient number of outcomes (<7 outcomes per adjusted covariate).

**Supplemental Table 3. Risk of death following COVID-19 in patients treated with CD20 inhibitors for neurologic disease indications versus comparators.**

|                                    | <b>CD20 Inhibitor-Treated Neurologic Disease Cases (n=43)</b> | <b>Matched Comparators (n=211)</b> |
|------------------------------------|---------------------------------------------------------------|------------------------------------|
| Deaths, n (%)                      | 2 (5)                                                         | 4 (2)                              |
| Total follow-up time (person-days) | 6551                                                          | 34051                              |
| Incidence rate/1000 days (95% CI)  | 0.3 (0.0 to 0.7)                                              | 0.1 (0.0 to 0.2)                   |
| Unadjusted HR (95% CI)             | 2.41 (0.66 to 8.77)                                           | Ref                                |
| Adjusted model 1 HR (95% CI)*      | NR                                                            | Ref                                |
| Adjusted model 2 HR (95% CI)       | NR                                                            | Ref                                |
| Adjusted model 3 HR (95% CI)       | NR                                                            | Ref                                |

HR, hazard ratio; CI, confidence interval; BMI, body mass index; CCI, Charlson comorbidity index; Ref, reference; NR, not reported

\* Model 1 adjusted for age. Model 2 adjusted for age and race. Model 3 adjusted for age, race, BMI, and CCI (dichotomized as <2 or ≥2). Adjusted models not reported due to insufficient number of outcomes (<7 outcomes per adjusted covariate).

**Supplemental Table 4. Risk of death following COVID-19 in immune-mediated cases treated with CD20 inhibitors for greater than or less than 1 year versus matched comparators.**

|                                    | <b>&lt; 1 Year of CD20 Inhibitor Exposure</b>              |                                    | <b>&gt; 1 Year of CD20 Inhibitor Exposure</b>              |                                    |
|------------------------------------|------------------------------------------------------------|------------------------------------|------------------------------------------------------------|------------------------------------|
|                                    | <b>CD20 Inhibitor-Treated Immune-Mediated Cases (n=81)</b> | <b>Matched Comparators (n=399)</b> | <b>CD20 Inhibitor-Treated Immune-Mediated Cases (n=33)</b> | <b>Matched Comparators (n=160)</b> |
| Deaths, n (%)                      | 7 (9)                                                      | 11 (3)                             | 5 (15)                                                     | 10 (6)                             |
| Total follow-up time (person-days) | 11088                                                      | 59458                              | 4730                                                       | 24714                              |
| Incidence rate/1000 days (95% CI)  | 0.6 (0.2 to 1.1)                                           | 0.2 (0.1 to 0.3)                   | 1.1 (0.1 to 2.0)                                           | 0.4 (0.2 to 0.7)                   |
| Unadjusted HR (95% CI)             | 2.82 (1.34 to 5.96)                                        | Ref                                | 2.92 (0.95 to 8.99)                                        | Ref                                |
| Adjusted model 1 HR (95% CI)*      | 2.85 (1.35 to 6.01)                                        | Ref                                | 2.90 (0.95 to 8.87)                                        | Ref                                |
| Adjusted model 2 HR (95% CI)       | 2.91 (1.26 to 6.74)                                        | Ref                                | 2.02 (0.61 to 6.70)                                        | Ref                                |
| Adjusted model 3 HR (95% CI)†      | NR                                                         | Ref                                | NR                                                         | Ref                                |

HR, hazard ratio; CI, confidence interval; BMI, body mass index; CCI, Charlson comorbidity index; Ref, reference; NR, not reported

\* Model 1 adjusted for age. Model 2 adjusted for age and race. Model 3 adjusted for age, race, BMI, and CCI (dichotomized as <2 or ≥2).

† Model 3 not reported due to insufficient number of outcomes (<7 outcomes per adjusted covariate).

**Supplemental Table 5. Risk of death following COVID-19 in patients treated with CD20 inhibitors and not receiving glucocorticoids versus comparators.**

|                                    | <b>CD20 Inhibitor-Treated Cases (n=79)</b> | <b>Matched Comparators (n=384)</b> |
|------------------------------------|--------------------------------------------|------------------------------------|
| Deaths, n (%)                      | 6 (8)                                      | 6 (2)                              |
| Total follow-up time (person-days) | 11878                                      | 61304                              |
| Incidence rate/1000 days (95% CI)  | 0.50 (0.10 to 0.90)                        | 0.10 (0.00 to 0.20)                |
| Unadjusted HR (95% CI)             | 4.37 (1.79 to 10.71)                       | Ref                                |
| Adjusted model 1 HR (95% CI)*      | 4.43 (1.79 to 10.98)                       | Ref                                |
| Adjusted model 2 HR (95% CI)†      | NR                                         | Ref                                |
| Adjusted model 3 HR (95% CI)       | NR                                         | Ref                                |

HR, hazard ratio; CI, confidence interval; BMI, body mass index; CCI, Charlson comorbidity index; Ref, reference; NR, not reported

\* Model 1 adjusted for age. Model 2 adjusted for age and race. Model 3 adjusted for age, race, BMI, and CCI (dichotomized as <2 or ≥2).

† Models 2 and 3 not reported due to insufficient number of outcomes (<7 outcomes per adjusted covariate).

**Supplemental Table 6. Risk of death following COVID-19 in patients without cancer treated with CD20 inhibitors versus comparators.**

|                                    | <b>CD20 Inhibitor-Treated Cases (n=103)</b> | <b>Matched Comparators (n=502)</b> |
|------------------------------------|---------------------------------------------|------------------------------------|
| Deaths, n (%)                      | 11 (11)                                     | 19 (4)                             |
| Total follow-up time (person-days) | 14558                                       | 76981                              |
| Incidence rate/1000 days (95% CI)  | 0.80 (0.30 to 1.20)                         | 0.20 (0.10 to 0.40)                |
| Unadjusted HR (95% CI)             | 3.00 (1.53 to 5.92)                         | Ref                                |
| Adjusted model 1 HR (95% CI)*      | 2.99 (1.52 to 5.86)                         | Ref                                |
| Adjusted model 2 HR (95% CI)       | 2.57 (1.21 to 5.45)                         | Ref                                |
| Adjusted model 3 HR (95% CI)       | 2.20 (1.00 to 4.85)                         | Ref                                |

HR, hazard ratio; CI, confidence interval; BMI, body mass index; CCI, Charlson comorbidity index.

\* Model 1 adjusted for age. Model 2 adjusted for age and race. Model 3 adjusted for age, race, BMI, and CCI (dichotomized as <2 or ≥2).

**Supplemental Table 7. Risk of death following COVID-19 in patients without interstitial lung disease treated with CD20 inhibitors versus comparators.**

|                                    | <b>CD20 Inhibitor-Treated Cases (n=89)</b> | <b>Matched Comparators (n=396)</b> |
|------------------------------------|--------------------------------------------|------------------------------------|
| Deaths, n (%)                      | 6 (7)                                      | 7 (2)                              |
| Total follow-up time (person-days) | 13535                                      | 65014                              |
| Incidence rate/1000 days (95% CI)  | 0.40 (0.10 to 0.80)                        | 0.10 (0.00 to 0.20)                |
| Unadjusted HR (95% CI)             | 3.51 (1.41 to 8.71)                        | Ref                                |
| Adjusted model 1 HR (95% CI)*      | 3.45 (1.36 to 8.73)                        | Ref                                |
| Adjusted model 2 HR (95% CI)†      | NR                                         | Ref                                |
| Adjusted model 3 HR (95% CI)       | NR                                         | Ref                                |

HR, hazard ratio; CI, confidence interval; BMI, body mass index; CCI, Charlson comorbidity index; Ref, reference; NR, not reported

\* Model 1 adjusted for age. Model 2 adjusted for age and race. Model 3 adjusted for age, race, BMI, and CCI (dichotomized as <2 or ≥2).

† Models 2 and 3 not reported due to insufficient number of outcomes (<7 outcomes per adjusted covariate).

**Supplemental Table 8. Risk of death following COVID-19 in patients treated with most recent CD20 inhibitor dose within 3 months of COVID-19 infection versus comparators.**

|                                    | CD20 Inhibitor-Treated Cases (n=48) | Matched Comparators (n=235) |
|------------------------------------|-------------------------------------|-----------------------------|
| Deaths, n (%)                      | 7 (15)                              | 6 (3)                       |
| Total follow-up time (person-days) | 6099                                | 34753                       |
| Incidence rate/1000 days (95% CI)  | 1.10 (0.30 to 2.00)                 | 0.20 (0.00 to 0.30)         |
| Unadjusted HR (95% CI)             | 9.59 (2.98 to 30.85)                | Ref                         |
| Adjusted model 1 HR (95% CI)*      | 9.79 (3.00 to 31.93)                | Ref                         |
| Adjusted model 2 HR (95% CI)†      | NR                                  | Ref                         |
| Adjusted model 3 HR (95% CI)       | NR                                  | Ref                         |

HR, hazard ratio; CI, confidence interval; BMI, body mass index; CCI, Charlson comorbidity index; Ref, reference; NR, not reported

\* Model 1 adjusted for age. Model 2 adjusted for age and race. Model 3 adjusted for age, race, BMI, and CCI (dichotomized as <2 or ≥2).

† Models 2 and 3 not reported due to insufficient number of outcomes (<7 outcomes per adjusted covariate).

**\*\*\*\*POTENTIAL Supplemental Table 9. Immune-mediated disease status at the time of COVID-19 diagnosis by timing of most recent rituximab dose prior to infection. \*\*\*\***

|                                | Most recent CD20 inhibitor dose < 3 months prior to COVID-19 (n=48) | Most recent CD20 inhibitor dose 3-6 months prior to COVID-19 (n=44) | Most recent CD20 inhibitor dose 6-12 months prior to COVID-19 (n=22) | P-value |
|--------------------------------|---------------------------------------------------------------------|---------------------------------------------------------------------|----------------------------------------------------------------------|---------|
| Immune-mediated disease status |                                                                     |                                                                     |                                                                      | 0.23    |
| Remission                      | 13 (27)                                                             | 7 (16)                                                              | 6 (27)                                                               |         |
| Low activity                   | 19 (40)                                                             | 28 (64)                                                             | 11 (50)                                                              |         |
| Moderate/high activity         | 16 (33)                                                             | 9 (20)                                                              | 5 (23)                                                               |         |

| Number of death                | Most recent CD20 inhibitor dose < 3 months prior to COVID-19 (n=48) | Most recent CD20 inhibitor dose 3-6 months prior to COVID-19 (n=44) | Most recent CD20 inhibitor dose 6-12 months prior to COVID-19 (n=22) |
|--------------------------------|---------------------------------------------------------------------|---------------------------------------------------------------------|----------------------------------------------------------------------|
| Immune-mediated disease status |                                                                     |                                                                     |                                                                      |
| Remission                      | 1 (2)                                                               | 1 (2)                                                               | 0 (0)                                                                |

|                        |        |       |       |
|------------------------|--------|-------|-------|
| Low activity           | 1 (2)  | 2 (4) | 0 (0) |
| Moderate/high activity | 5 (10) | 1 (2) | 1 (5) |
